# Supplementary material
Source: MDPI journal article supplement (https://www.mdpi.com/2220-9964/12/10/436)
Supplement: s1 [file s1]

# Climate Change, Forest Fires, and Territorial Dynamics in the Amazon Rainforest: An Integrated Analysis for Mitigation Strategies

Nathalia Celis, Alejandro Casallas, Ellie Anne Lopez-Barrera, Martina Felician, Massimo De Marchi, Salvatore E. Pappalardo

## Supplementary Material

| Year | Path/Row | Date (dd/mm) |
|------|----------|--------------|
| 2013 | 7/60     | 23/11        |
|      | 8/60     | 11/09        |
|      | 8/59     | 11/09        |
| 2014 | 7/60     | 31/03        |
|      | 8/60     | 19/12        |
|      | 8/59     | 19/12        |
| 2015 | 7/60     | 26/09        |
|      | 8/60     | 20/11        |
|      | 8/59     | 20/11        |
| 2016 | 7/60     | 01/02        |
|      | 8/60     | 11/03        |
|      | 8/59     | 11/03        |
| 2017 | 7/60     | 19/02        |
|      | 8/60     | 25/01        |
|      | 8/59     | 25/01        |
| 2018 | 7/60     | 18/09        |
|      | 8/60     | 09/09        |
|      | 8/59     | 24/08        |
| 2019 | 7/60     | 25/02        |
|      | 8/60     | 10/07        |
|      | 8/59     | 04/05        |
| 2020 | 7/60     | 27/01        |
|      | 8/60     | 22/03        |
|      | 8/59     | 22/03        |
| 2021 | 7/60     | 29/01        |

|  |      |       |
|--|------|-------|
|  | 8/60 | 17/09 |
|  | 8/59 | 28/05 |

**Table S1.** Satellite data specifications used in Cartagena del Chaira, Caquetá-Colombia.

| <b>Class ID</b> | <b>PBLCC Classification</b> | <b>Description</b>                   |
|-----------------|-----------------------------|--------------------------------------|
| WAT             | Water                       | Deep Water Bodies/Rivers (DWAT/SWAT) |
| SI              | Snow                        | Snow/Ice                             |
| DWAT            | Water                       | Deep Water Bodies/Rivers (DWAT/SWAT) |
| CL              | Clouds                      | Clouds                               |
| SV              | Shadowed Vegetation         | Shadowed/Low Illuminated Vegetation  |
| SS              | Shadowed Soil               | Shadowed Soil/Burnt Areas            |
| SPV             | Sparse Vegetation           | Sparse Grassland/Sparse Shrub        |
| OLD             | Other Land Dark             | Dark Soil/Rocks/Sand                 |
| OLL             | Other Land Light            | Light Soil/Rocks/Sand                |
| TCD             | Tree Cover Dark             | Dense Forest/Dense Shrub             |
| TCL             | Tree Cover Light            | Open Forest/Shrub                    |
| SHR             | Shrub                       | Dense Shrub                          |
| GRS             | Grassland                   | Dense Grassland/Open Shrub           |

**Table S2.** PBLCC Classification based on the work of Simonetti et al. (2014)

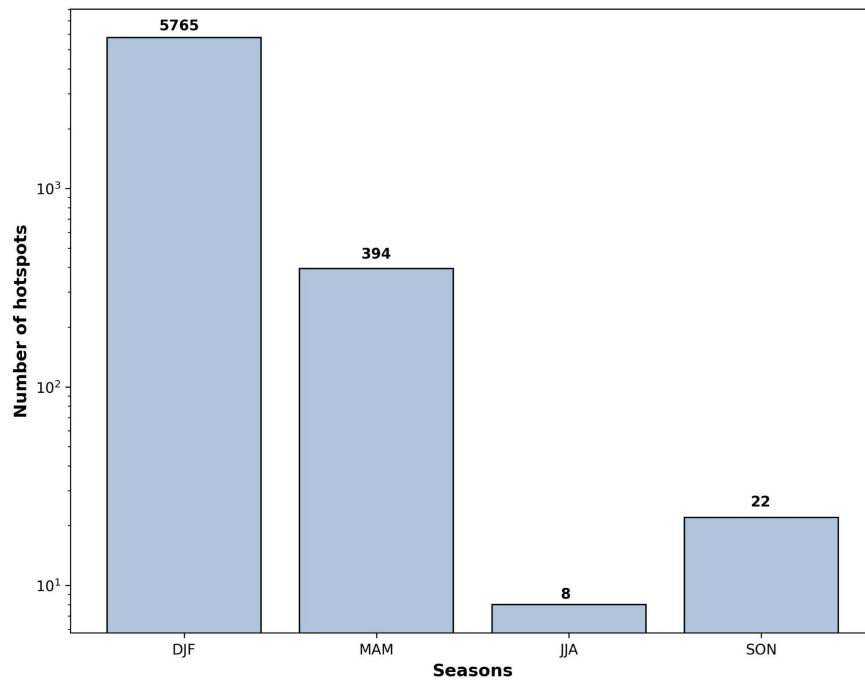

**Figure S1.** Seasonal number of hotspots in Cartagena del Chaira from 2010 to 2022. Notice that the y-axis has a logarithmic scale.

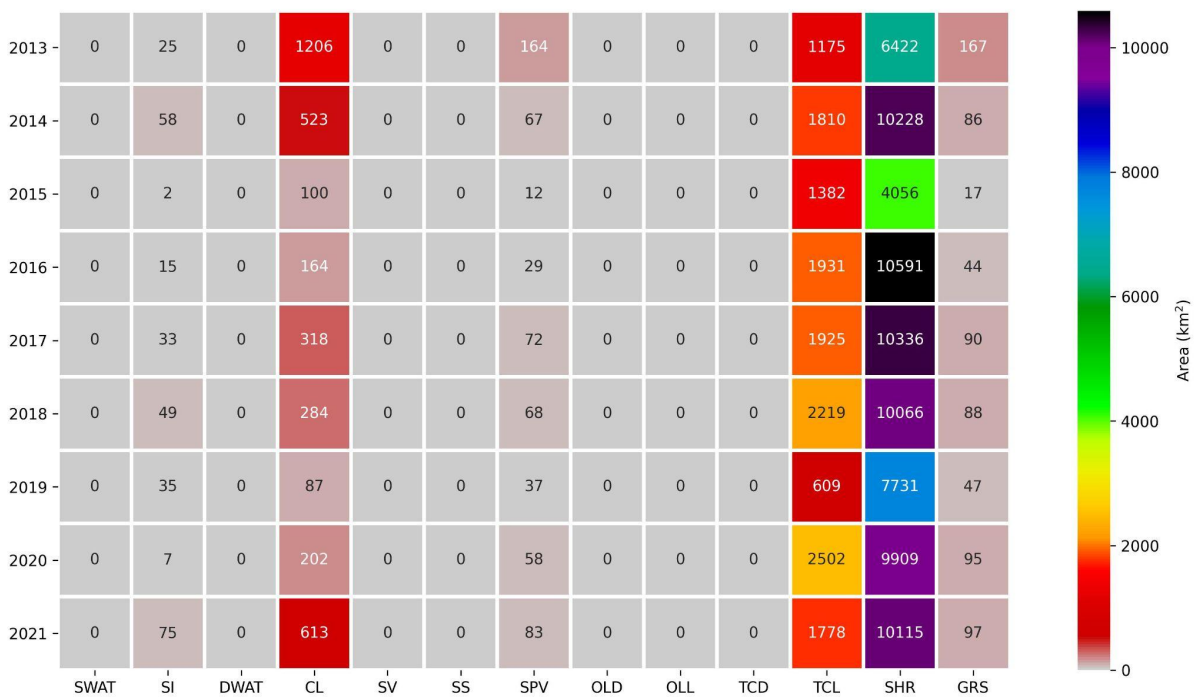

**Figure S2.** Area in km<sup>2</sup> of each land cover category from Simonetti et al. (2014). The nomenclature of the x-axis is described in Table S2.

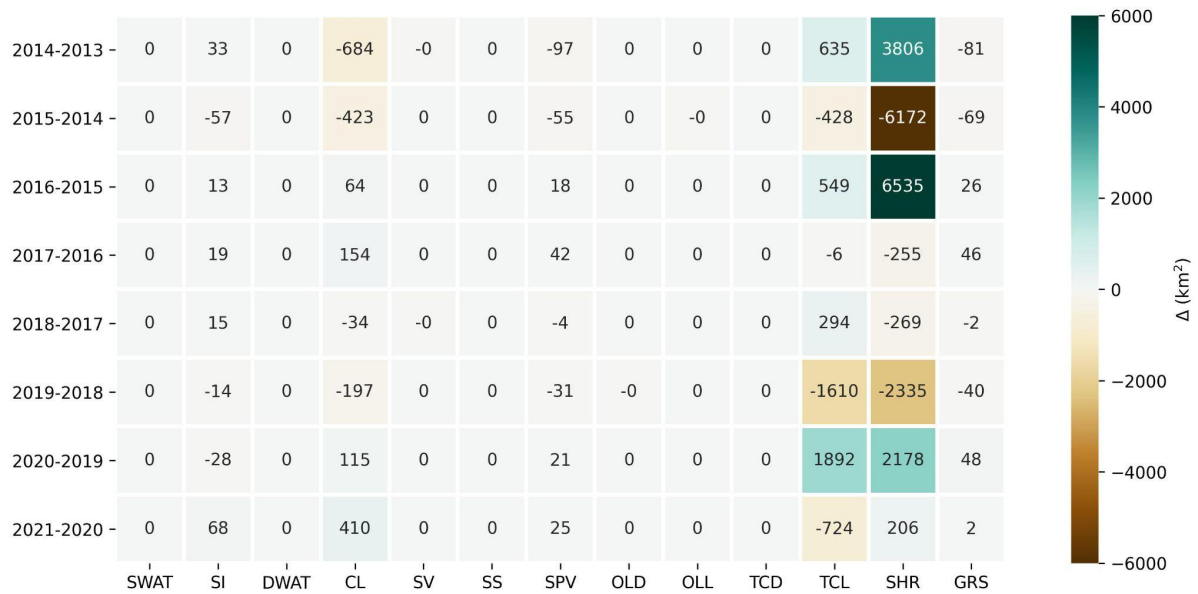

**Figure S3.** Land cover category changes per year in  $\text{km}^2$ . The categories are from Simonetti et al.(2014). The nomenclature of the x-axis is described in Table S2.

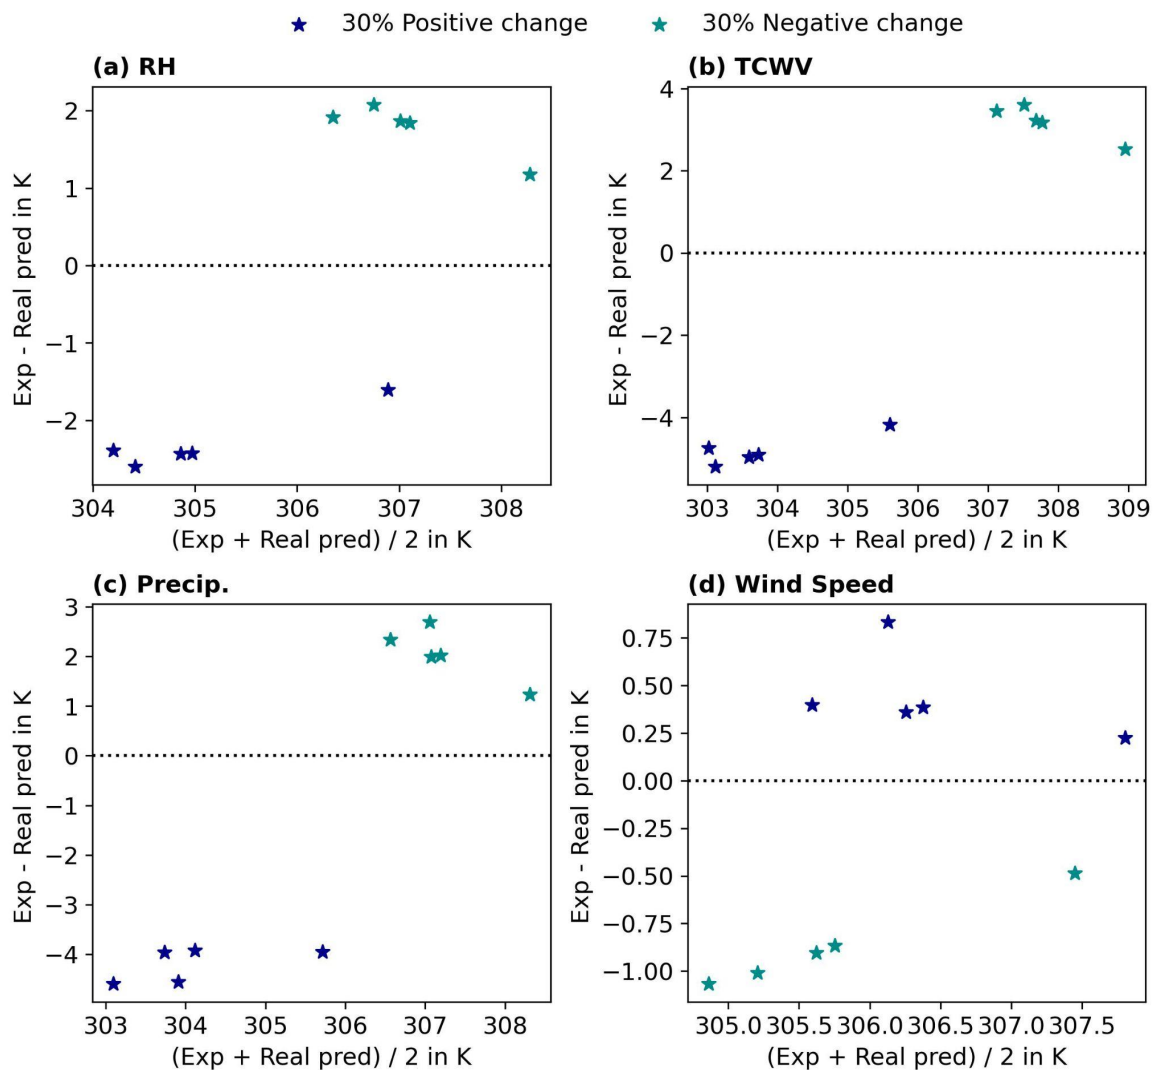

**Figure S4.** Experiments increasing (blue stars) and decreasing (green stars) by 30% the meteorological variables: (a) RH, (b) TCWV, (c) Precipitation, and (d) Wind Speed. For plotting purposes each star represents the mean of 10 wildfire events that present similar temperatures.
